# Supplementary material for: Genetic structure and designing a preliminary core collection of Zizania latifolia in China based on 12 microsatellites markers
Source: PeerJ. 2025 Feb 21;13:e18909. doi: 10.7717/peerj.18909 (PMC11849519; doi:10.7717/peerj.18909)
Supplement: Supplemental Information 6 [file peerj-13-18909-s006.xlsx]

## Sheet: Sheet1
12	357	25	11	27	11	12	5	24	3	7	8	15	6	32	9	12	14	9	24	15	17	15	20	21	12	19	9	1	357
Random codominant data with XY coords			Pop1	Pop2	Pop3	Pop4	Pop5	Pop6	Pop7	Pop8	Pop9	Pop10	Pop11	Pop12	Pop13	Pop14	Pop15	Pop16	Pop17	Pop18	Pop19	Pop20	Pop21	Pop22	Pop23	Pop24	Pop25
Sample	Pop	ZM4		ZM5		ZM13		ZM16		ZM24		ZM25		ZM26		ZM28		ZM30		ZM35		ZM44		Zt23
1	Pop1	1	1	1	1	2	2	1	1	1	1	1	1	1	1	1	1	1	1	2	2	2	2	1	1
2	Pop1	1	1	1	1	2	2	1	1	1	1	1	1	1	1	1	1	1	1	2	2	2	2	1	1
3	Pop1	3	3	1	1	2	2	0	0	2	2	2	2	1	1	1	1	1	1	0	0	3	3	3	3
4	Pop1	2	2	1	1	2	2	2	2	1	1	1	1	2	2	1	1	2	2	2	2	2	2	1	1
5	Pop1	2	2	1	1	2	2	1	1	3	3	1	1	1	1	1	1	1	1	0	0	3	3	3	3
6	Pop1	1	1	1	1	2	2	4	4	3	3	2	2	1	1	1	1	1	1	0	0	3	3	3	3
7	Pop1	2	2	1	1	2	2	4	4	3	3	1	1	6	6	1	1	1	1	2	2	1	1	1	1
8	Pop1	1	1	1	1	2	2	2	2	1	1	1	1	3	3	3	3	2	2	0	0	3	3	1	1
9	Pop1	1	1	1	1	2	2	1	1	3	3	2	2	3	3	3	3	3	3	0	0	2	2	3	3
10	Pop1	1	1	1	1	2	2	1	1	3	3	1	1	2	2	0	0	0	0	0	0	3	3	3	3
11	Pop1	2	2	1	1	0	0	1	1	3	3	1	1	2	2	4	4	2	2	2	2	6	6	1	1
12	Pop2	2	2	1	1	2	2	1	1	1	1	1	1	4	4	1	1	2	2	2	2	6	6	1	1
13	Pop2	1	1	1	1	2	2	1	1	3	3	1	1	4	4	1	1	2	2	2	2	6	6	1	1
14	Pop2	2	2	1	1	2	2	1	1	2	2	1	1	4	4	1	1	1	1	1	1	0	0	1	1
15	Pop2	3	3	2	2	1	1	3	3	1	1	1	1	6	6	1	1	2	2	0	0	3	3	1	1
16	Pop2	1	1	1	1	2	2	1	1	3	3	1	1	2	2	1	1	0	0	1	1	4	4	1	1
17	Pop2	2	2	2	2	1	1	1	1	1	1	1	1	2	2	1	1	4	4	2	2	3	3	1	1
18	Pop2	1	1	1	1	2	2	5	5	1	1	1	1	5	5	1	1	3	3	2	2	3	3	1	1
19	Pop2	2	2	1	1	2	2	5	5	3	3	1	1	5	5	1	1	3	3	2	2	2	2	1	1
20	Pop2	1	1	1	1	2	2	5	5	1	1	1	1	2	2	1	1	2	2	1	1	4	4	1	1
21	Pop2	1	1	2	2	1	1	1	1	1	1	1	1	2	2	1	1	4	4	1	1	4	4	1	1
22	Pop2	1	1	2	2	1	1	1	1	1	1	1	1	2	2	4	4	4	4	1	1	4	4	1	1
23	Pop2	2	2	2	2	1	1	1	1	1	1	1	1	2	2	4	4	4	4	1	1	5	5	1	1
24	Pop2	1	1	2	2	1	1	1	1	1	1	1	1	2	2	4	4	4	4	1	1	5	5	1	1
25	Pop2	1	1	2	2	1	1	1	1	3	3	1	1	2	2	1	1	4	4	1	1	5	5	1	2
26	Pop2	0	0	2	2	1	1	1	1	3	3	1	1	3	3	1	1	4	4	2	2	3	3	1	2
27	Pop2	1	1	1	1	2	2	1	1	1	1	1	1	3	3	1	1	2	2	2	2	3	3	1	2
28	Pop2	1	1	1	1	2	2	1	1	1	1	1	1	3	3	1	1	2	2	2	2	3	3	1	1
29	Pop2	1	1	1	1	2	2	1	1	1	1	1	1	2	2	1	1	2	2	1	1	4	4	1	1
30	Pop2	1	1	2	2	1	1	1	1	1	1	1	1	2	2	1	1	4	4	1	1	4	4	1	1
31	Pop2	1	1	2	2	1	1	1	1	1	1	1	1	6	6	1	1	4	4	1	1	4	4	1	1
32	Pop2	1	1	2	2	1	1	1	1	1	1	1	1	6	6	1	1	4	4	1	1	4	4	1	1
33	Pop2	1	1	2	2	1	1	5	5	1	1	1	1	6	6	1	1	4	4	1	1	4	4	1	1
34	Pop2	1	1	2	2	1	1	1	1	0	0	1	1	6	6	1	1	4	4	0	0	0	0	1	1
35	Pop2	1	1	2	2	1	1	1	1	3	3	1	1	3	3	2	2	0	0	4	4	1	1	1	2
36	Pop2	1	1	1	1	2	2	1	1	3	3	1	1	3	3	2	2	1	1	4	4	1	1	1	2
37	Pop2	1	1	1	1	2	2	1	1	1	1	1	1	3	3	1	1	1	1	0	0	7	7	1	1
38	Pop2	1	1	1	1	2	2	1	1	1	1	1	1	3	3	1	1	2	2	0	0	8	8	1	1
39	Pop3	3	3	1	1	1	2	1	1	1	1	2	2	3	3	1	1	2	2	5	5	5	5	1	1
40	Pop3	1	1	1	1	2	2	1	1	1	1	1	1	3	3	1	1	2	2	5	5	9	9	1	1
41	Pop3	1	1	1	1	2	2	1	1	3	3	1	1	2	2	1	1	1	1	6	6	9	9	1	1
42	Pop3	1	1	1	1	2	2	1	1	1	1	1	1	2	2	1	1	1	1	6	6	10	10	1	1
43	Pop3	2	2	1	1	2	2	4	4	1	1	1	1	2	2	1	1	2	2	1	1	10	10	1	1
44	Pop3	2	2	2	2	1	1	1	1	1	1	1	1	2	2	1	1	4	4	1	1	4	4	1	1
45	Pop3	2	2	2	2	1	1	1	1	1	1	1	1	2	2	1	1	4	4	1	1	4	4	1	1
46	Pop3	1	1	2	2	1	1	1	1	1	1	1	1	2	2	1	1	4	4	1	1	4	4	1	1
47	Pop3	1	1	2	2	1	1	1	1	1	1	1	1	2	2	1	1	4	4	1	1	5	5	1	1
48	Pop3	1	1	2	2	1	1	1	1	3	3	1	1	2	2	1	1	4	4	1	1	5	5	1	2
49	Pop3	1	1	2	2	1	1	1	1	1	1	1	1	6	6	3	3	4	4	1	1	5	5	3	3
50	Pop4	1	1	1	1	1	2	1	1	1	1	1	1	3	3	2	2	2	3	2	2	5	5	1	1
51	Pop4	0	0	1	1	1	2	1	1	1	1	1	1	6	6	1	1	2	2	3	3	4	4	1	1
52	Pop4	3	4	1	1	2	2	5	5	3	3	1	1	2	2	1	1	2	4	1	1	1	1	1	2
53	Pop4	2	2	2	2	1	1	5	5	1	1	1	1	2	2	1	1	4	4	1	1	11	11	1	1
54	Pop4	1	1	2	2	1	1	1	1	1	1	1	1	2	2	1	1	4	4	1	1	4	4	1	1
55	Pop4	1	1	2	2	1	1	1	1	1	1	1	1	2	2	1	1	4	4	1	1	4	4	1	1
56	Pop4	1	1	2	2	1	1	2	2	1	1	1	1	2	2	1	1	4	4	1	1	4	4	0	0
57	Pop4	1	1	2	2	1	1	2	2	1	1	1	1	2	2	1	1	4	4	1	1	4	4	2	2
58	Pop4	1	1	2	2	1	1	0	0	1	1	1	1	6	6	3	3	4	4	2	2	4	4	2	2
59	Pop4	1	1	1	1	2	2	1	1	1	1	1	1	6	6	3	3	1	3	2	2	4	4	2	2
60	Pop4	1	1	1	1	2	2	1	1	1	1	1	1	6	6	3	3	2	3	2	2	1	1	1	1
61	Pop4	2	2	1	1	2	2	1	1	1	1	1	1	2	2	1	1	2	3	2	2	1	1	1	1
62	Pop5	2	2	1	1	2	2	1	1	1	1	1	1	2	2	1	1	2	2	1	1	1	1	1	1
63	Pop5	2	2	2	2	1	1	1	1	1	1	1	1	2	2	1	1	4	4	1	1	5	5	1	1
64	Pop5	1	1	2	2	1	1	1	1	1	1	1	1	2	2	1	1	4	4	1	1	5	5	1	1
65	Pop5	1	1	2	2	1	1	1	1	1	1	1	1	2	2	1	1	4	4	1	1	5	5	3	3
66	Pop5	1	1	2	2	1	1	1	1	1	1	1	1	6	6	1	1	4	4	0	0	5	5	3	3
67	Pop6	1	1	1	1	2	2	1	1	1	1	1	1	1	1	1	1	2	2	2	2	5	5	1	1
68	Pop6	1	1	1	1	2	2	1	1	1	1	1	1	2	2	1	1	2	4	1	1	9	9	1	1
69	Pop6	2	2	2	2	1	1	1	1	1	1	1	1	2	2	1	1	4	4	1	1	1	1	1	1
70	Pop6	2	2	2	2	1	1	1	1	1	1	1	1	2	2	1	1	4	4	1	1	5	5	1	1
71	Pop6	1	1	2	2	1	1	1	1	1	1	1	1	2	2	1	1	4	4	1	1	5	5	3	3
72	Pop6	1	1	2	2	1	1	1	1	1	1	1	1	6	6	1	1	4	4	0	0	5	5	3	3
73	Pop6	1	1	1	1	2	2	1	1	1	1	1	1	6	6	1	1	2	2	1	1	5	5	3	3
74	Pop6	1	1	1	1	2	2	1	1	1	1	1	1	6	6	1	1	4	4	0	0	9	9	3	3
75	Pop6	2	2	1	1	2	2	1	1	1	1	1	1	6	6	1	1	2	2	0	0	9	9	3	3
76	Pop6	2	2	1	1	2	2	1	1	1	1	1	1	6	6	1	1	2	2	0	0	9	9	3	3
77	Pop6	2	2	1	1	2	2	1	1	1	1	1	1	6	6	1	1	2	2	1	1	9	9	3	3
78	Pop6	2	2	1	1	2	2	1	1	1	1	1	1	6	6	1	1	2	2	0	0	9	9	1	1
79	Pop6	2	2	1	1	2	2	1	1	1	1	1	1	2	2	1	1	2	2	0	0	9	9	1	1
80	Pop6	2	2	2	2	1	1	1	1	1	1	1	1	2	2	1	1	4	4	1	1	9	9	0	0
81	Pop6	2	2	2	2	1	1	1	1	0	0	1	1	0	0	0	0	4	4	1	1	5	5	1	1
82	Pop6	1	1	2	2	1	1	1	1	1	1	0	0	2	2	1	1	4	4	1	1	0	0	1	1
83	Pop6	0	0	2	2	1	1	1	1	1	1	1	1	2	2	1	1	4	4	1	1	5	5	1	1
84	Pop6	1	1	2	2	1	1	1	1	1	1	1	1	2	2	1	1	4	4	1	1	5	5	1	1
85	Pop6	1	1	2	2	1	1	1	1	1	1	1	1	2	2	1	1	4	4	1	1	5	5	1	1
86	Pop6	1	1	2	2	1	1	1	1	1	1	1	1	2	2	1	1	4	4	1	1	0	0	1	1
87	Pop6	1	1	2	2	1	1	1	1	1	1	1	1	2	2	1	1	4	4	1	1	5	5	1	1
88	Pop6	0	0	2	2	1	1	1	1	1	1	1	1	2	2	1	1	4	4	1	1	5	5	1	1
89	Pop6	1	1	2	2	1	1	1	1	1	1	1	1	2	2	1	1	4	4	1	1	5	5	1	1
90	Pop6	1	1	2	2	1	1	1	1	1	1	1	1	2	2	1	1	4	4	1	1	5	5	1	1
91	Pop7	1	1	2	2	1	1	1	1	1	1	1	1	2	2	1	1	4	4	1	1	5	5	1	1
92	Pop7	1	1	2	2	1	1	1	1	1	1	1	1	2	2	1	1	4	4	1	1	5	5	1	1
93	Pop7	1	1	2	2	1	1	1	1	1	1	1	1	2	2	1	1	4	4	1	1	5	5	1	1
94	Pop8	1	1	0	0	3	3	3	3	1	1	1	1	2	2	1	1	4	4	1	1	5	5	0	0
95	Pop8	1	1	0	0	1	1	1	1	1	1	1	1	0	0	1	1	4	4	1	1	5	5	1	1
96	Pop8	0	0	2	2	1	1	1	1	1	1	0	0	2	2	1	1	4	4	1	1	0	0	1	1
97	Pop8	1	1	2	2	1	1	1	1	1	1	1	1	2	2	1	1	4	4	1	1	5	5	1	1
98	Pop8	1	1	2	2	1	1	1	1	1	1	1	1	2	2	1	1	4	4	1	1	5	5	1	1
99	Pop8	1	1	0	0	1	1	1	1	1	1	1	1	2	2	1	1	4	4	1	1	5	5	0	0
100	Pop8	1	1	2	2	1	1	1	1	1	1	1	1	2	2	1	1	4	4	1	1	5	5	1	1
101	Pop9	1	1	2	2	0	0	1	1	1	1	1	1	0	0	0	0	4	4	1	1	5	5	1	1
102	Pop9	0	0	2	2	1	1	1	1	1	1	0	0	2	2	1	1	4	4	1	1	0	0	1	1
103	Pop9	1	1	2	2	1	1	1	1	1	1	1	1	2	2	1	1	4	4	1	1	5	5	1	1
104	Pop9	1	1	1	1	1	1	1	1	1	1	1	1	2	2	1	1	4	4	1	1	5	5	1	1
105	Pop9	1	1	2	2	1	1	1	1	1	1	1	1	2	2	1	1	4	4	1	1	5	5	1	1
106	Pop9	1	1	2	2	1	1	1	1	1	1	1	1	2	2	1	1	4	4	1	1	5	5	1	1
107	Pop9	2	2	2	2	1	1	1	1	1	1	1	1	2	2	1	1	4	4	1	1	5	5	0	0
108	Pop9	3	3	2	2	1	1	1	1	1	1	1	1	2	2	1	1	4	4	1	1	5	5	1	1
109	Pop10	2	2	2	2	1	1	1	1	1	1	1	1	2	2	1	1	4	4	1	1	5	5	1	1
110	Pop10	2	2	2	2	1	1	1	1	1	1	1	1	2	2	1	1	4	4	1	1	5	5	1	1
111	Pop10	2	2	2	2	1	1	0	0	1	1	1	1	2	2	1	1	4	4	1	1	0	0	1	1
112	Pop10	2	2	1	1	1	1	1	1	1	1	1	1	2	2	1	1	4	4	1	1	5	5	1	1
113	Pop10	2	2	2	2	1	1	1	1	1	1	1	1	2	2	1	1	4	4	1	1	5	5	1	1
114	Pop10	2	2	2	2	1	1	1	1	1	1	1	1	2	2	1	1	4	4	1	1	5	5	1	1
115	Pop10	2	2	1	1	1	1	1	1	1	1	1	1	2	2	1	1	4	4	1	1	5	5	1	1
116	Pop10	3	3	2	2	1	1	3	3	1	1	1	1	2	2	1	1	4	4	1	1	0	0	1	1
117	Pop10	1	1	2	2	1	1	1	1	1	1	1	1	2	2	1	1	4	4	1	1	5	5	1	1
118	Pop10	1	1	2	2	1	1	1	1	1	1	1	1	2	2	1	1	4	4	0	0	5	5	1	1
119	Pop10	3	3	1	1	1	1	0	0	1	1	1	1	2	2	1	1	4	4	1	1	0	0	1	1
120	Pop10	1	1	2	2	1	1	1	1	1	1	1	1	2	2	1	1	4	4	1	1	5	5	1	1
121	Pop10	1	1	2	2	1	1	1	1	1	1	1	1	2	2	1	1	4	4	1	1	5	5	1	1
122	Pop10	1	1	2	2	1	1	1	1	1	1	1	1	2	2	1	1	4	4	1	1	5	5	1	1
123	Pop10	3	3	2	2	1	1	1	1	1	1	1	1	2	2	1	1	4	4	1	1	5	5	1	1
124	Pop11	1	1	2	2	1	1	1	1	1	1	1	1	2	2	1	1	4	4	1	1	5	5	1	1
125	Pop11	1	1	2	2	1	1	1	1	1	1	1	1	2	2	1	1	4	4	1	1	5	5	1	1
126	Pop11	1	1	2	2	1	1	1	1	1	1	1	1	2	2	1	1	4	4	1	1	5	5	1	1
127	Pop11	1	1	2	2	1	1	1	1	1	1	1	1	2	2	1	1	4	4	1	1	5	5	1	1
128	Pop11	1	1	0	0	1	1	1	1	1	1	1	1	2	2	1	1	4	4	1	1	5	5	0	0
129	Pop11	1	1	2	2	1	1	1	1	1	1	1	1	2	2	1	1	4	4	1	1	5	5	1	1
130	Pop12	3	3	2	2	1	1	1	1	0	0	1	1	2	2	1	1	2	2	7	7	5	5	1	1
131	Pop12	1	1	2	2	1	1	1	1	0	0	2	2	6	6	1	1	4	4	1	1	9	9	1	1
132	Pop12	1	1	1	1	1	1	1	1	0	0	1	1	2	2	1	1	2	2	7	7	5	5	1	1
133	Pop12	1	1	1	1	1	1	1	1	0	0	2	2	2	2	1	1	4	4	1	1	5	5	1	1
134	Pop12	1	1	1	1	2	2	1	1	0	0	1	1	6	6	1	1	4	4	1	1	1	1	1	1
135	Pop12	1	1	2	2	2	2	1	1	0	0	1	1	6	6	1	1	2	2	8	8	1	1	1	1
136	Pop12	2	2	2	2	2	2	1	1	0	0	1	1	6	6	1	1	2	2	8	8	1	1	1	1
137	Pop12	2	2	1	1	1	1	5	5	0	0	1	1	2	2	1	1	6	6	8	8	5	5	1	1
138	Pop12	1	1	1	1	1	1	1	1	0	0	1	1	2	2	1	1	4	4	1	1	5	5	1	1
139	Pop12	2	2	1	1	2	2	1	1	1	1	1	1	6	6	4	4	4	4	1	1	1	1	3	3
140	Pop12	1	1	1	1	2	2	2	2	3	3	1	1	6	6	4	4	3	3	0	0	1	1	3	3
141	Pop12	1	1	1	1	2	2	2	2	1	1	1	1	6	6	5	5	3	3	0	0	2	2	1	1
142	Pop12	2	2	1	1	2	2	1	1	1	1	1	1	6	6	5	5	2	2	0	0	2	2	1	1
143	Pop12	2	2	1	1	2	2	1	1	1	1	1	1	6	6	1	1	2	2	0	0	5	5	1	1
144	Pop12	2	2	1	1	2	2	1	1	1	1	1	1	6	6	2	2	2	2	2	2	2	2	1	1
145	Pop12	2	2	1	1	2	2	1	1	1	1	1	1	6	6	1	1	2	4	1	1	9	9	1	1
146	Pop12	3	4	1	1	2	2	1	1	1	1	1	1	6	6	1	1	5	5	0	0	9	9	1	1
147	Pop12	1	1	1	1	2	2	1	1	1	1	1	1	6	6	1	1	5	5	0	0	11	11	1	1
148	Pop12	2	2	1	1	2	2	1	1	1	1	1	1	2	2	1	1	4	4	0	0	11	11	1	1
149	Pop12	2	2	1	1	2	2	1	1	1	1	1	1	2	2	1	1	4	4	0	0	11	11	1	1
150	Pop12	1	1	1	1	2	2	1	1	1	1	1	1	2	2	1	1	4	4	0	0	11	11	1	1
151	Pop12	1	1	3	3	2	2	1	1	1	1	1	1	2	2	1	1	4	4	1	1	2	2	3	3
152	Pop12	1	1	3	3	2	2	1	1	1	1	1	1	6	6	1	1	5	5	0	0	2	2	3	3
153	Pop12	2	2	1	1	1	2	1	1	1	1	1	1	6	6	1	1	5	5	0	0	5	5	1	1
154	Pop12	1	1	1	1	1	2	1	1	1	1	1	1	1	1	1	1	2	2	0	0	5	5	1	1
155	Pop12	1	1	2	2	2	2	1	1	1	1	1	1	1	1	1	1	2	2	0	0	1	1	1	1
156	Pop12	3	4	2	2	2	2	1	1	1	1	1	1	6	6	1	1	6	6	8	8	1	1	1	1
157	Pop12	3	4	1	1	1	1	5	5	1	1	1	1	6	6	1	1	4	4	8	8	5	5	1	1
158	Pop12	1	1	1	1	1	1	1	1	1	1	1	1	2	2	1	1	4	4	1	1	5	5	1	1
159	Pop12	2	2	1	1	2	2	1	1	1	1	1	1	2	2	3	3	2	2	1	1	1	1	1	1
160	Pop12	1	1	1	1	2	2	1	1	1	1	1	1	1	1	3	3	2	2	1	1	1	1	1	1
161	Pop12	1	1	1	1	2	2	2	2	1	1	1	1	1	1	1	1	2	2	1	1	1	1	1	1
162	Pop13	1	1	1	1	2	2	2	2	1	1	1	1	6	6	1	1	2	2	2	2	8	8	3	3
163	Pop13	1	1	1	1	2	2	1	1	1	1	1	1	6	6	1	1	2	2	2	2	8	8	2	2
164	Pop13	1	1	1	1	1	1	1	1	1	1	1	1	6	6	1	1	3	3	2	2	1	1	3	3
165	Pop13	1	1	1	1	1	2	1	1	3	3	1	1	6	6	1	1	3	3	0	0	1	1	1	1
166	Pop13	1	1	1	1	1	1	1	1	1	1	1	1	6	6	1	1	3	3	0	0	1	1	1	1
167	Pop13	1	1	1	1	2	2	1	1	3	3	1	1	6	6	1	1	1	3	0	0	7	7	1	1
168	Pop13	1	1	1	1	2	2	1	1	1	1	1	1	6	6	1	1	1	3	2	2	7	7	2	2
169	Pop13	1	1	1	1	2	2	4	4	3	3	1	1	6	6	1	1	1	3	2	2	7	7	2	2
170	Pop13	1	1	1	1	2	2	4	4	1	1	1	1	6	6	1	1	2	2	2	2	8	8	0	0
171	Pop14	1	1	1	1	2	2	4	4	1	1	1	1	2	2	1	1	2	2	0	0	8	8	0	0
172	Pop14	1	1	1	1	2	2	2	2	1	1	1	1	2	2	1	1	2	2	0	0	8	8	2	2
173	Pop14	1	1	1	1	2	2	2	2	1	1	1	1	2	2	1	1	2	2	0	0	8	8	3	3
174	Pop14	1	1	1	1	2	2	2	2	1	1	1	1	1	1	1	1	2	2	0	0	8	8	3	3
175	Pop14	1	1	1	1	2	2	2	2	1	1	1	1	1	1	1	1	2	2	0	0	9	9	2	2
176	Pop14	1	1	1	1	2	2	2	2	1	1	1	1	2	2	1	1	2	2	2	2	9	9	1	1
177	Pop14	1	1	1	1	2	2	2	2	1	1	1	1	2	2	1	1	2	2	2	2	9	9	1	1
178	Pop14	1	1	1	1	2	2	2	2	1	1	1	1	2	2	1	1	2	2	2	2	9	9	1	1
179	Pop14	1	1	1	1	2	2	2	2	1	1	1	1	2	2	1	1	2	2	2	2	8	8	2	2
180	Pop14	1	1	2	2	2	2	2	2	3	3	1	1	2	2	1	1	2	2	0	0	8	8	2	2
181	Pop14	1	1	2	2	2	2	2	2	1	1	1	1	2	2	1	1	2	2	0	0	8	8	2	2
182	Pop14	2	2	2	2	1	1	2	2	1	1	1	1	2	2	1	1	4	4	0	0	5	5	1	1
183	Pop15	2	2	2	2	1	1	2	2	1	1	1	1	2	2	1	1	4	4	1	1	5	5	1	1
184	Pop15	1	1	2	2	1	1	1	1	1	1	1	1	2	2	1	1	4	4	1	1	5	5	1	1
185	Pop15	1	1	2	2	1	1	4	4	1	1	1	1	2	2	1	1	4	4	1	1	5	5	1	1
186	Pop15	2	2	2	2	1	1	1	1	1	1	1	1	2	2	1	1	4	4	1	1	5	5	1	1
187	Pop15	2	2	2	2	1	1	1	1	1	1	1	1	2	2	1	1	4	4	1	1	5	5	1	1
188	Pop15	1	1	2	2	1	1	1	1	1	1	1	1	2	2	1	1	4	4	1	1	5	5	1	1
189	Pop15	1	1	2	2	1	1	1	1	1	1	1	1	2	2	1	1	4	4	1	1	5	5	1	1
190	Pop15	1	1	2	2	1	1	1	1	1	1	1	1	2	2	1	1	4	4	1	1	5	5	0	0
191	Pop15	1	1	2	2	1	1	1	1	1	1	1	1	2	2	1	1	4	4	1	1	5	5	1	1
192	Pop15	1	1	2	2	1	1	1	1	1	1	1	1	2	2	1	1	4	4	1	1	5	5	1	1
193	Pop15	1	1	2	2	1	1	1	1	1	1	1	1	2	2	1	1	4	4	1	1	5	5	1	1
194	Pop15	1	1	2	2	1	1	1	1	1	1	1	1	2	2	1	1	4	4	1	1	5	5	1	1
195	Pop15	1	1	2	2	1	1	1	1	1	1	1	1	2	2	1	1	4	4	1	1	5	5	1	1
196	Pop15	1	1	2	2	1	1	1	1	1	1	1	1	2	2	1	1	4	4	1	1	5	5	1	1
197	Pop16	1	1	2	2	1	1	1	1	1	1	1	1	2	2	1	1	4	4	1	1	5	5	1	1
198	Pop16	1	1	2	2	1	1	1	1	1	1	1	1	2	2	1	1	4	4	1	1	5	5	1	1
199	Pop16	1	1	2	2	1	1	1	1	1	1	1	1	2	2	1	1	4	4	1	1	5	5	1	1
200	Pop16	1	1	2	2	1	1	0	0	1	1	1	1	2	2	1	1	4	4	1	1	5	5	1	1
201	Pop16	1	1	2	2	1	1	0	0	1	1	1	1	2	2	1	1	4	4	1	1	5	5	1	1
202	Pop16	1	1	2	2	1	1	0	0	1	1	1	1	2	2	1	1	4	4	1	1	5	5	1	1
203	Pop16	1	1	2	2	1	1	0	0	1	1	1	1	2	2	1	1	4	4	1	1	5	5	1	1
204	Pop16	1	1	2	2	1	1	0	0	1	1	1	1	2	2	1	1	4	4	1	1	5	5	1	1
205	Pop16	1	1	2	2	1	1	0	0	1	1	1	1	2	2	1	1	4	4	1	1	5	5	1	1
206	Pop17	1	1	2	2	1	1	1	1	1	1	1	1	2	2	1	1	4	4	1	1	5	5	1	1
207	Pop17	1	1	2	2	1	1	1	1	1	1	1	1	2	2	1	1	4	4	1	1	5	5	1	1
208	Pop17	1	1	2	2	1	1	1	1	1	1	1	1	2	2	1	1	4	4	1	1	5	5	1	1
209	Pop17	1	1	2	2	1	1	0	0	1	1	1	1	2	2	1	1	4	4	1	1	5	5	1	1
210	Pop17	1	1	2	2	1	1	0	0	1	1	1	1	2	2	1	1	4	4	1	1	5	5	1	1
211	Pop17	3	3	2	2	1	1	0	0	1	1	1	1	0	0	1	1	4	4	1	1	5	5	1	1
212	Pop17	1	1	2	2	1	1	0	0	1	1	1	1	1	1	1	1	4	4	1	1	5	5	1	1
213	Pop17	1	1	2	2	1	1	0	0	1	1	1	1	0	0	1	1	4	4	1	1	5	5	1	1
214	Pop17	1	1	2	2	1	1	0	0	1	1	1	1	0	0	1	1	4	4	1	1	5	5	1	1
215	Pop17	1	1	2	2	1	1	0	0	1	1	1	1	0	0	1	1	4	4	1	1	5	5	1	1
216	Pop17	1	1	2	2	1	1	0	0	1	1	1	1	0	0	1	1	4	4	1	1	5	5	1	1
217	Pop17	1	1	2	2	1	1	0	0	1	1	1	1	2	2	1	1	4	4	1	1	5	5	1	1
218	Pop17	1	1	2	2	1	1	0	0	1	1	1	1	2	2	1	1	4	4	1	1	5	5	1	1
219	Pop17	1	1	2	2	1	1	0	0	1	1	1	1	2	2	1	1	4	4	1	1	5	5	1	1
220	Pop17	1	1	2	2	1	1	0	0	1	1	1	1	2	2	1	1	4	4	1	1	5	5	1	1
221	Pop17	1	1	2	2	1	1	0	0	1	1	1	1	2	2	1	1	4	4	1	1	5	5	1	1
222	Pop17	1	1	2	2	1	1	0	0	1	1	1	1	2	2	1	1	4	4	1	1	5	5	1	1
223	Pop17	1	1	2	2	1	1	0	0	1	1	1	1	2	2	1	1	4	4	1	1	5	5	1	1
224	Pop17	3	3	2	2	1	1	0	0	1	1	1	1	2	2	1	1	4	4	1	1	5	5	1	1
225	Pop17	3	3	2	2	1	1	0	0	1	1	1	1	2	2	1	1	4	4	1	1	5	5	1	1
226	Pop17	3	3	1	1	1	1	0	0	1	1	1	1	2	2	1	1	4	4	1	1	5	5	1	1
227	Pop17	3	3	1	1	1	1	0	0	1	1	1	1	2	2	1	1	4	4	1	1	5	5	1	1
228	Pop17	3	3	1	1	1	1	0	0	1	1	1	1	2	2	1	1	4	4	1	1	5	5	1	1
229	Pop17	3	3	2	2	2	2	0	0	1	1	1	1	2	2	1	1	2	2	1	1	8	8	2	2
230	Pop18	3	3	2	2	2	2	0	0	1	1	1	1	2	2	1	1	2	2	0	0	8	8	2	2
231	Pop18	1	1	2	2	2	2	0	0	1	1	1	1	2	2	1	1	2	2	1	1	8	8	3	3
232	Pop18	3	3	2	2	1	1	0	0	1	1	1	1	2	2	1	1	4	4	1	1	5	5	1	1
233	Pop18	1	1	2	2	1	1	0	0	3	3	1	1	2	2	1	1	4	4	1	1	5	5	1	1
234	Pop18	1	1	2	2	1	1	1	1	3	3	1	1	2	2	1	1	4	4	1	1	5	5	1	1
235	Pop18	1	1	2	2	1	1	1	1	3	3	1	1	2	2	1	1	4	4	1	1	5	5	1	1
236	Pop18	1	1	2	2	1	1	1	1	3	3	1	1	2	2	1	1	4	4	1	1	5	5	1	1
237	Pop18	1	1	2	2	1	1	1	1	3	3	1	1	2	2	1	1	4	4	1	1	5	5	1	1
238	Pop18	2	2	2	2	1	1	1	1	3	3	1	1	2	2	1	1	4	4	1	1	5	5	1	1
239	Pop18	2	2	2	2	1	1	1	1	3	3	1	1	2	2	1	1	4	4	1	1	5	5	1	1
240	Pop18	0	0	2	2	1	1	1	1	3	3	1	1	2	2	1	1	4	4	1	1	5	5	1	1
241	Pop18	2	2	2	2	1	1	1	1	3	3	1	1	2	2	1	1	4	4	1	1	5	5	1	1
242	Pop18	2	2	2	2	1	1	1	1	3	3	1	1	2	2	1	1	4	4	1	1	5	5	1	1
243	Pop18	0	0	2	2	1	1	1	1	3	3	1	1	2	2	1	1	4	4	1	1	5	5	1	1
244	Pop18	0	0	1	1	1	1	1	1	3	3	1	1	2	2	1	1	4	4	1	1	5	5	1	1
245	Pop19	0	0	1	1	1	1	1	1	3	3	1	1	2	2	1	1	4	4	1	1	5	5	1	1
246	Pop19	0	0	1	1	1	1	1	1	3	3	1	1	2	2	1	1	4	4	2	2	5	5	1	1
247	Pop19	2	2	1	1	2	2	1	1	3	3	1	1	6	6	1	1	2	2	2	2	8	8	2	2
248	Pop19	2	2	1	1	2	2	1	1	3	3	1	1	6	6	1	1	2	2	2	2	8	8	2	2
249	Pop19	2	2	1	1	2	2	0	0	3	3	1	1	6	6	1	1	2	2	2	2	8	8	2	2
250	Pop19	2	2	0	0	2	2	1	1	3	3	1	1	6	6	1	1	2	2	0	0	0	0	2	2
251	Pop19	2	2	1	1	2	2	0	0	3	3	1	1	6	6	1	1	4	4	0	0	8	8	2	2
252	Pop19	3	3	1	1	2	2	1	1	3	3	0	0	6	6	1	1	4	4	0	0	8	8	2	2
253	Pop19	3	3	1	1	2	2	4	4	3	3	1	1	6	6	1	1	4	4	2	2	8	8	2	2
254	Pop19	3	3	1	1	2	2	4	4	3	3	1	1	6	6	1	1	4	4	2	2	9	9	3	3
255	Pop19	0	0	1	1	2	2	4	4	3	3	1	1	6	6	3	3	4	4	2	2	9	9	3	3
256	Pop19	3	3	1	1	2	2	2	2	3	3	1	1	6	6	3	3	4	4	2	2	9	9	3	3
257	Pop19	0	0	1	1	2	2	2	2	3	3	1	1	6	6	3	3	4	4	2	2	9	9	3	3
258	Pop19	3	3	1	1	2	2	2	2	1	1	1	1	6	6	3	3	4	4	0	0	9	9	3	3
259	Pop19	3	3	1	1	2	2	2	2	3	3	1	1	6	6	3	3	4	4	0	0	9	9	3	3
260	Pop19	3	3	1	1	2	2	2	2	3	3	1	1	6	6	3	3	4	4	0	0	8	8	2	2
261	Pop19	3	3	1	1	2	2	2	2	1	1	1	1	6	6	1	1	4	4	0	0	8	8	2	2
262	Pop20	3	3	1	1	2	2	1	1	3	3	1	1	6	6	1	1	4	4	2	2	8	8	2	2
263	Pop20	0	0	1	1	2	2	1	1	3	3	1	1	6	6	1	1	4	4	0	0	8	8	2	2
264	Pop20	3	3	1	1	2	2	1	1	1	1	1	1	6	6	1	1	2	2	2	2	8	8	2	2
265	Pop20	3	3	1	1	2	2	1	1	2	2	1	1	6	6	1	1	2	2	0	0	8	8	2	2
266	Pop20	3	3	1	1	2	2	1	1	3	3	1	1	6	6	1	1	2	2	1	1	8	8	2	2
267	Pop20	0	0	1	1	2	2	1	1	3	3	1	1	6	6	1	1	2	2	0	0	5	5	3	3
268	Pop20	0	0	1	1	2	2	1	1	3	3	1	1	6	6	1	1	2	3	2	2	5	5	3	3
269	Pop20	3	3	1	1	2	2	1	1	3	3	1	1	6	6	1	1	2	3	0	0	5	5	3	3
270	Pop20	3	3	1	1	2	2	1	1	3	3	1	1	6	6	1	1	2	3	0	0	5	5	3	3
271	Pop20	0	0	1	1	2	2	1	1	3	3	1	1	6	6	1	1	2	3	2	2	4	4	2	2
272	Pop20	3	3	1	1	2	2	1	1	3	3	1	1	6	6	1	1	2	2	2	2	4	4	2	2
273	Pop20	0	0	0	0	2	2	1	1	3	3	1	1	6	6	1	1	2	2	2	2	4	4	2	2
274	Pop20	0	0	0	0	2	2	1	1	3	3	1	1	6	6	1	1	2	2	2	2	4	4	2	2
275	Pop20	3	3	1	1	2	2	1	1	3	3	1	1	6	6	1	1	2	2	0	0	0	0	0	0
276	Pop20	2	2	1	1	2	2	0	0	0	0	1	1	6	6	0	0	0	0	1	1	4	4	2	2
277	Pop21	2	2	1	1	2	2	1	1	0	0	1	1	6	6	1	1	2	4	1	1	4	4	2	2
278	Pop21	2	2	0	0	2	2	1	1	3	3	1	1	2	2	1	1	2	4	2	2	12	12	1	1
279	Pop21	2	2	0	0	2	2	1	1	3	3	1	1	2	2	1	1	1	1	2	2	12	12	1	1
280	Pop21	1	1	1	1	2	2	0	0	3	3	1	1	2	2	1	1	2	2	2	2	12	12	1	1
281	Pop21	3	3	1	1	2	2	4	4	2	2	1	1	6	6	1	1	2	2	2	2	8	8	3	3
282	Pop21	3	3	1	1	2	2	4	4	3	3	1	1	6	6	1	1	2	2	2	2	8	8	3	3
283	Pop21	2	2	1	1	2	2	4	4	1	1	1	1	6	6	1	1	2	4	2	2	8	8	3	3
284	Pop21	2	2	1	1	2	2	2	2	3	3	1	1	1	1	1	1	2	4	0	0	10	10	3	3
285	Pop21	0	0	1	1	2	2	2	2	3	3	1	1	1	1	1	1	2	4	0	0	10	10	3	3
286	Pop21	0	0	1	1	2	2	2	2	1	1	1	1	1	1	1	1	2	4	0	0	10	10	3	3
287	Pop21	1	1	1	1	2	2	2	2	1	1	1	1	2	2	1	1	2	6	2	2	10	10	2	2
288	Pop21	1	1	1	1	2	2	4	4	3	3	1	1	6	6	1	1	2	4	2	2	7	7	1	1
289	Pop21	3	3	1	1	2	2	2	2	3	3	1	1	2	2	1	1	4	4	2	2	10	10	2	2
290	Pop21	2	2	1	1	0	0	3	3	1	1	1	1	2	2	1	1	4	4	2	2	9	9	1	1
291	Pop21	2	2	0	0	2	2	1	1	3	3	1	1	2	2	1	1	4	4	2	2	9	9	1	1
292	Pop21	1	1	1	1	2	2	1	1	3	3	1	1	2	2	0	0	0	0	2	2	9	9	1	1
293	Pop21	1	1	1	1	2	2	0	0	3	3	1	1	2	2	1	1	4	4	2	2	10	10	0	0
294	Pop21	1	1	1	1	2	2	4	4	3	3	1	1	6	6	1	1	0	0	2	2	10	10	1	1
295	Pop21	2	2	1	1	2	2	4	4	0	0	1	1	6	6	1	1	2	2	2	2	8	8	3	3
296	Pop21	2	2	1	1	2	2	1	1	3	3	1	1	1	1	1	1	2	2	2	2	7	7	1	1
297	Pop22	1	1	1	1	2	2	1	1	3	3	1	1	6	6	1	1	2	4	2	2	5	5	2	2
298	Pop22	1	1	1	1	2	2	1	1	1	1	1	1	6	6	1	1	2	4	0	0	5	5	2	2
299	Pop22	3	3	1	1	2	2	0	0	1	1	1	1	6	6	1	1	0	0	0	0	5	5	2	2
300	Pop22	3	3	1	1	2	2	1	1	3	3	1	1	6	6	1	1	2	4	0	0	5	5	2	2
301	Pop22	2	2	1	1	2	2	1	1	1	1	1	1	6	6	1	1	2	4	0	0	5	5	2	2
302	Pop22	3	3	1	1	2	2	1	1	3	3	1	1	6	6	1	1	2	4	0	0	5	5	2	2
303	Pop22	3	3	1	1	2	2	1	1	3	3	1	1	6	6	1	1	2	4	2	2	5	5	2	2
304	Pop22	3	3	1	1	2	2	1	1	0	0	1	1	6	6	1	1	2	4	0	0	5	5	2	2
305	Pop22	0	0	1	1	2	2	3	3	3	3	1	1	6	6	1	1	2	4	0	0	5	5	2	2
306	Pop22	3	3	1	1	2	2	1	1	1	1	1	1	6	6	1	1	2	4	0	0	5	5	2	2
307	Pop22	3	3	1	1	2	2	1	1	1	1	1	1	6	6	1	1	2	4	0	0	5	5	2	2
308	Pop22	3	3	1	1	2	2	1	1	1	1	1	1	6	6	1	1	2	4	1	1	5	5	2	2
309	Pop22	3	3	1	1	2	2	3	3	3	3	1	1	6	6	2	2	3	3	0	0	0	0	2	2
310	Pop22	3	3	1	1	2	2	1	1	3	3	1	1	6	6	2	2	3	3	0	0	5	5	2	2
311	Pop22	3	3	1	1	2	2	1	1	3	3	1	1	6	6	2	2	3	3	0	0	5	5	2	2
312	Pop22	3	3	0	0	2	2	1	1	3	3	1	1	6	6	2	2	0	0	0	0	5	5	2	2
313	Pop22	3	3	1	1	2	2	1	1	3	3	1	1	6	6	1	1	3	3	0	0	8	8	2	2
314	Pop22	3	3	1	1	2	2	1	1	3	3	1	1	6	6	1	1	3	3	0	0	8	8	2	2
315	Pop22	1	1	1	1	2	2	1	1	0	0	1	1	6	6	1	1	3	3	0	0	8	8	2	2
316	Pop22	1	1	1	1	2	2	1	1	3	3	1	1	6	6	1	1	3	3	0	0	8	8	2	2
317	Pop22	1	1	2	2	2	2	1	1	3	3	1	1	6	6	1	1	3	3	1	1	8	8	2	2
318	Pop23	1	1	2	2	1	1	1	1	2	2	1	1	2	2	1	1	4	4	1	1	5	5	1	1
319	Pop23	1	1	2	2	1	1	1	1	3	3	1	1	2	2	1	1	4	4	1	1	5	5	1	1
320	Pop23	1	1	2	2	1	1	1	1	2	2	1	1	2	2	1	1	4	4	1	1	5	5	1	1
321	Pop23	1	1	2	2	1	1	1	1	1	1	1	1	2	2	1	1	4	4	1	1	5	5	1	1
322	Pop23	1	1	2	2	1	1	1	1	3	3	1	1	2	2	1	1	4	4	1	1	5	5	1	1
323	Pop23	1	1	2	2	1	1	1	1	3	3	1	1	2	2	1	1	4	4	1	1	5	5	1	1
324	Pop23	1	1	2	2	1	1	1	1	1	1	1	1	2	2	1	1	4	4	1	1	5	5	1	1
325	Pop23	1	1	2	2	1	1	1	1	1	1	1	1	2	2	1	1	4	4	1	1	5	5	1	1
326	Pop23	1	1	2	2	1	1	1	1	1	1	1	1	2	2	1	1	4	4	1	1	5	5	1	1
327	Pop23	1	1	2	2	1	1	1	1	1	1	1	1	2	2	1	1	4	4	1	1	5	5	1	1
328	Pop23	0	0	2	2	1	1	1	1	3	3	1	1	2	2	1	1	4	4	1	1	5	5	1	1
329	Pop23	3	3	2	2	1	1	1	1	1	1	1	1	2	2	1	1	4	4	1	1	5	5	1	1
330	Pop24	1	1	2	2	1	1	1	1	1	1	1	1	2	2	1	1	4	4	1	1	4	4	1	1
331	Pop24	1	1	2	2	1	1	1	1	1	1	1	1	2	2	1	1	4	4	1	1	4	4	1	1
332	Pop24	1	1	2	2	1	1	1	1	1	1	1	1	2	2	1	1	4	4	1	1	4	4	1	1
333	Pop24	1	1	2	2	1	1	1	1	3	3	1	1	2	2	1	1	4	4	1	1	4	4	1	1
334	Pop24	1	1	2	2	1	1	1	1	1	1	1	1	2	2	1	1	4	4	1	1	4	4	1	1
335	Pop24	1	1	0	0	1	1	1	1	1	1	1	1	2	2	1	1	4	4	1	1	4	4	1	1
336	Pop24	1	1	2	2	0	0	0	0	3	3	1	1	2	2	1	1	4	4	1	1	4	4	0	0
337	Pop24	3	3	2	2	1	1	1	1	3	3	1	1	2	2	1	1	2	4	1	1	4	4	1	1
338	Pop24	3	3	2	2	1	1	1	1	1	1	1	1	2	2	1	1	4	4	1	1	4	4	1	1
339	Pop24	1	1	2	2	1	1	1	1	3	3	1	1	2	2	1	1	4	4	1	1	4	4	1	1
340	Pop24	1	1	2	2	1	1	1	1	3	3	1	1	2	2	1	1	4	4	1	1	4	4	1	1
341	Pop24	1	1	2	2	1	1	1	1	3	3	1	1	2	2	1	1	4	4	1	1	4	4	1	1
342	Pop24	1	1	2	2	1	1	1	1	1	1	1	1	2	2	1	1	4	4	1	1	4	4	1	1
343	Pop24	1	1	2	2	1	1	1	1	1	1	1	1	2	2	1	1	4	4	1	1	4	4	1	1
344	Pop24	1	1	2	2	1	1	0	0	1	1	1	1	2	2	1	1	4	4	1	1	4	4	1	1
345	Pop24	1	1	1	1	1	1	1	1	3	3	1	1	2	2	1	1	4	4	1	1	4	4	1	1
346	Pop24	1	1	1	1	2	2	1	1	3	3	1	1	2	2	1	1	2	2	2	2	1	1	1	1
347	Pop24	1	1	1	1	2	2	1	1	1	1	1	1	2	2	1	1	2	2	2	2	1	1	1	1
348	Pop24	1	1	2	2	2	2	1	1	1	1	1	1	2	2	1	1	2	2	2	2	1	1	1	1
349	Pop25	1	1	2	2	1	1	1	1	1	1	1	1	2	2	1	1	2	4	1	1	4	4	1	1
350	Pop25	1	1	2	2	1	1	1	1	1	1	1	1	2	2	1	1	2	4	1	1	4	4	1	1
351	Pop25	1	1	2	2	1	1	1	1	1	1	1	1	2	2	1	1	2	4	1	1	4	4	1	1
352	Pop25	1	1	1	1	2	2	1	1	3	3	1	1	2	2	1	1	2	2	2	2	1	1	1	1
353	Pop25	1	1	1	1	2	2	1	1	3	3	1	1	2	2	1	1	2	2	2	2	1	1	1	1
354	Pop25	1	1	1	1	2	2	1	1	3	3	1	1	2	2	1	1	2	2	2	2	1	1	1	1
355	Pop25	1	1	1	1	2	2	1	1	1	1	1	1	2	2	1	1	2	2	2	2	1	1	1	1
356	Pop25	1	1	1	1	2	2	1	1	1	1	1	1	2	2	1	1	2	2	2	2	1	1	1	1
357	Pop25	1	1	1	1	2	2	1	1	1	1	1	1	2	2	1	1	2	2	2	2	1	1	1	1
